1  $P_{AOX1}$  expression in mixed-substrate continuous cultures of  
2 *Komagataella phaffii* (*Pichia pastoris*) is completely determined by  
3 methanol consumption regardless of the secondary carbon source

4 Running title:  $P_{AOX1}$  expression is completely determined by methanol consumption

5 Anamika Singh<sup>1,2</sup> and Atul Narang<sup>1,\*</sup>

6 <sup>1</sup>Department of Biochemical Engineering and Biotechnology, Indian Institute of Technology,  
7 Hauz Khas, New Delhi 110016, India

8 <sup>2</sup>Present address: International Centre for Genetic Engineering and Biotechnology, New Delhi  
9 110067, India

10 \*corresponding author; Email: [anarang@dbeb.iitd.ac.in](mailto:anarang@dbeb.iitd.ac.in)

11 Telephone: +91-11-2659-1061

12 Funding Information: This research was supported by the grant BT/PR13831/BBE/117/68/2015  
13 received from the Department of Biotechnology (DBT), Government of India.

14

## 1 Abstract

2 The expression of recombinant proteins by the *AOX1* promoter of *Komagataella phaffii* is  
3 typically induced by adding methanol to the cultivation medium. Since growth on methanol  
4 imposes a high oxygen demand, the medium is often supplemented with an additional  
5 secondary carbon source which serves to reduce the consumption of methanol, and hence,  
6 oxygen. Early research recommended the use of glycerol as the secondary carbon source, but  
7 more recent studies recommend the use of sorbitol because glycerol represses  $P_{AOX1}$   
8 expression. To assess the validity of this recommendation, we measured the steady state  
9 concentrations of biomass, residual methanol, and LacZ expressed from  $P_{AOX1}$  over a wide  
10 range of dilution rates ( $0.02\text{--}0.20\text{ h}^{-1}$ ) in continuous cultures of the Mut<sup>+</sup> strain fed with  
11 methanol + glycerol (repressing) and methanol + sorbitol (non-repressing). We find that under  
12 these conditions, the specific  $P_{AOX1}$  expression rate is completely determined by the specific  
13 methanol consumption rate regardless of the type (repressing/non-repressing) of the  
14 secondary carbon source. In both cultures, the specific  $P_{AOX1}$  expression rate is proportional to  
15 the specific methanol consumption rate provided that the latter is below  $0.15\text{ g}/(\text{gdw}\cdot\text{h})$ ;  
16 beyond this threshold consumption rate, the specific  $P_{AOX1}$  expression rate of both cultures  
17 saturates to the same value. Analysis of the data in the literature shows that the same  
18 phenomenon also occurs in continuous cultures of *Escherichia coli* fed with mixtures of lactose  
19 plus repressing/non-repressing carbon sources. The specific  $P_{lac}$  expression rate is completely  
20 determined by the specific lactose consumption rate regardless of the type of secondary  
21 carbon source, glycerol or glucose.

### 22 Key points:

- 23 •  $P_{AOX1}$  expression rate is completely determined by the methanol consumption rate.
- 24 • Sorbitol is not necessarily superior secondary carbon source than glycerol.

25  
26

27 **Key words:** *Komagataella phaffii* (*Pichia pastoris*), recombinant protein, glycerol, sorbitol,  
28 methanol, methanol consumption rate

29

30

## 1 Introduction

2 The methylotrophic yeast *Komagataella phaffii*, referred to earlier as *Pichia pastoris*  
3 (Kurtzman, 2005; Kurtzman, 2009), is a popular expression host (Schwarzshans *et al.*, 2016).  
4 There are several reasons for this, but the most important one is that *K. phaffii* has an  
5 unusually strong and tightly regulated promoter which drives the expression of alcohol  
6 oxidase (AOX) in the presence of methanol (Higgins and Cregg, 1998; Ahmad *et al.*, 2014;  
7 Gasser and Mattanovich, 2018). To be sure, *K. phaffii* has two alcohol oxidase genes, *AOX1*  
8 and *AOX2*, with corresponding promoters,  $P_{AOX1}$  and  $P_{AOX2}$ , but  $P_{AOX1}$  is used to drive  
9 recombinant protein expression since it is ~10 times stronger than  $P_{AOX2}$  (Cregg *et al.*, 1989).

10 In the first expression system constructed with *K. phaffii*, the wild-type strain was used as  
11 host, and recombinant protein was expressed under the control of  $P_{AOX1}$  by using methanol  
12 as inducer (Cregg *et al.*, 1985). Although this Mut<sup>+</sup> (methanol utilization plus) strain yielded  
13 excellent recombinant protein expression, the use of methanol as inducer led to several  
14 operational problems (McCauley-Patrick *et al.*, 2005; Cos *et al.*, 2006; Jahic *et al.*, 2006; Jungo  
15 *et al.*, 2007a; Arnau *et al.*, 2011; Potvin *et al.*, 2012; Yang and Zhang, 2018; García-Ortega *et*  
16 *al.*, 2019; Liu *et al.*, 2019). Indeed, methanol is inflammable which poses safety issues.  
17 Moreover, methanol metabolism results in high oxygen demand and heat generation, as well  
18 as excretion of toxic metabolites such as formaldehyde that inhibit growth (Jungo *et al.*,  
19 2007b; Juturu and Wu, 2018).

20 The problems stemming from the use of methanol as inducer led to several strategies for  
21 reducing methanol consumption. One strategy was to engineer the host strain by deleting  
22 either *AOX1* or both *AOX1* and *AOX2*, thus producing the Mut<sup>s</sup> (methanol utilization slow) and  
23 Mut<sup>-</sup> (methanol utilization minus) strains, respectively, whose capacity to consume methanol  
24 is substantially impaired or abolished (Chiruvolu *et al.*, 1997). Another strategy was to  
25 introduce into the medium, in addition to the *primary* or *inducing* carbon source methanol, a  
26 *secondary* or *non-inducing* carbon source that supports growth but not induction. This  
27 reduces methanol consumption due to the sparing effect of the secondary carbon source, and  
28 increases the volumetric productivity due to the enhanced cell growth derived from  
29 metabolism of the secondary carbon source (Brierley *et al.*, 1990; Egli and Mason, 1991, Jungo  
30 *et al.*, 2007a; Jungo *et al.*, 2007b; Paulova *et al.*, 2012).

1 The foregoing strategies have led to reduced methanol consumption, but they can also result  
2 in decreased recombinant protein expression. Recently, we found that host strain engineering  
3 decreases recombinant protein expression substantially — the specific productivities of the  
4 engineered Mut<sup>s</sup> and Mut<sup>-</sup> strains are respectively 5- and 10-fold lower than that of the Mut<sup>+</sup>  
5 strain (Singh and Narang, 2020). Since these three strains differ only with respect to their  
6 capacity for methanol consumption, the methanol consumption rate is an important  
7 determinant of the P<sub>AOX1</sub> expression rate.

8 The goal of this work is to quantify the extent to which P<sub>AOX1</sub> expression is affected by addition  
9 of a secondary carbon source to the medium. It is commonly held that this is determined by  
10 the type of the secondary carbon source. Specifically, these carbon sources have been  
11 classified as *repressing* or *non-repressing* based on the P<sub>AOX1</sub> expression levels observed in  
12 *batch* cultures of the Mut<sup>-</sup> strain grown on mixtures of methanol and various secondary  
13 carbon sources (Inan and Meagher, 2001). Repressing carbon sources, such as glycerol,  
14 abolish P<sub>AOX1</sub> expression, whereas non-repressing carbon sources, such as sorbitol, permit  
15 P<sub>AOX1</sub> expression. The same conclusion has been reached from studies of mixed-substrate  
16 growth in fed-batch cultures (Brierley *et al.*, 1990; Thorpe *et al.*, 1999; Xie *et al.*, 2005; Çelik  
17 *et al.*, 2009; Wang *et al.*, 2010; Gao *et al.*, 2012; Niu *et al.*, 2013; Carly *et al.*, 2016; Azadi *et al.*  
18 *et al.*, 2017; Chen *et al.*, 2017) and continuous cultures (Jungo *et al.*, 2006; Jungo *et al.*, 2007a;  
19 Jungo *et al.*, 2007b; Canales *et al.*, 2015; Berrios *et al.*, 2017). Indeed, even though glycerol is  
20 commonly used as the secondary carbon source, the use of sorbitol has been almost  
21 unanimously recommended on the grounds that glycerol represses P<sub>AOX1</sub> expression.

22 Most of the comparative studies cited above used constant fed-batch cultures, but these data  
23 can be difficult to interpret physiologically because the specific growth rate decreases  
24 throughout the course of the experiment (Nieto-Taype *et al.*, 2020). The comparative studies  
25 with continuous cultures are reviewed at length in the Discussion. Here, it suffices to note  
26 that many of these studies were performed at a fixed dilution rate  $D$ , and hence, specific  
27 growth rate (Jungo *et al.*, 2007a; Jungo *et al.*, 2007b; Berrios *et al.*, 2017). We reasoned that  
28 comparative studies over a wide range of  $D$  could yield deeper physiological insights into the  
29 factors governing P<sub>AOX1</sub> expression. Moreover, the optimal operating conditions determined  
30 in continuous cultures can also inform optimal protein production in exponential fed-batch  
31 cultures (Jungo *et al.*, 2007a; Jungo *et al.*, 2007b).

1 We were therefore led to study  $P_{AOX1}$  expression in continuous cultures of *K. phaffii* operated  
2 at various dilution rates with fixed concentrations of methanol + glycerol and methanol +  
3 sorbitol. To this end, we used a Mut<sup>+</sup> strain expressing LacZ from  $P_{AOX1}$ , but we also measured  
4 the AOX level to check the consistency of the data. We find that the specific  $P_{AOX1}$  expression  
5 rate is completely determined by the specific methanol consumption rate regardless of the  
6 type (repressing/non-repressing) of the secondary carbon source.

## 7 **Materials and Methods**

### 8 **Microorganism and growth medium**

9 A *K. phaffii* Mut<sup>+</sup> strain, GS115 (*his4*) was procured from J. M. Cregg, Keck Graduate Institute,  
10 Claremont, CA, USA and was genetically modified to express a recombinant  $\beta$ -galactosidase  
11 protein. Details of the strain construction have been presented elsewhere (Singh and Narang,  
12 2020). The resulting strain was called Mut<sup>+</sup> (pSAOH5-T1) and was used for this study. Stock  
13 cultures were stored in 25% glycerol at  $-80$  °C.

14 The minimal medium composition used for shake-flask as well as chemostat cultivations was  
15 chosen such as to ensure stoichiometric limitation by the carbon and energy sources as  
16 described in Egli and Fiechter (1981). The defined medium was supplemented with either  
17 glycerol ( $\sim 3.1$  g l<sup>-1</sup>) or a mixture of methanol ( $\sim 1.6$  g l<sup>-1</sup>)/( $\sim 3.2$  g l<sup>-1</sup>). and glycerol/sorbitol ( $\sim 1.5$   
18 g l<sup>-1</sup>) as carbon sources and in addition, contained 100 mM phosphate buffer (pH 5.5), 15.26  
19 g NH<sub>4</sub>Cl, 1.18 g MgSO<sub>4</sub>·7H<sub>2</sub>O, 110 mg CaCl<sub>2</sub>·2H<sub>2</sub>O, 45.61 mg FeCl<sub>3</sub>, 28 mg MnSO<sub>4</sub>·H<sub>2</sub>O, 44 mg  
20 ZnSO<sub>4</sub>·7H<sub>2</sub>O, 8 mg CuSO<sub>4</sub>·5H<sub>2</sub>O, 8.57 mg CoCl<sub>2</sub>·6H<sub>2</sub>O, 6 mg Na<sub>2</sub>MoO<sub>4</sub>·2H<sub>2</sub>O, 8 mg H<sub>3</sub>BO<sub>3</sub>, 1.2  
21 mg KI, 370 mg EDTA disodium salt, 2.4 mg biotin per liter. All components of the defined  
22 medium were prepared and sterilised by either filtration or autoclaving as separate stock  
23 solutions and then mixed before cultivation.

### 24 **Inoculum preparation and chemostat cultivation**

25 When required, cells were revived in a 100 mL shake flask containing 10 mL minimal medium  
26 supplemented with a suitable carbon source at 30 °C and 200 rpm. These primary cultures  
27 were sub-cultured once before inoculating the reactor precultures (in the same cultivation  
28 medium as prepared for the reactor vessel) which were then used as an inoculum for the  
29 bioreactor.

1 Chemostat cultivations were performed using bench-scale 0.5 L mini bioreactors modified to  
2 support chemostat operation and equipped with pH, DO, temperature, level and agitation  
3 controls (Applikon Biotechnology, The Netherlands) at working volumes of 0.3 L. The  
4 cultivation temperature was always maintained at 30 °C and pH at 5.5 by the automatic  
5 addition of 2 M NaOH. An integrated mass flow controller ensured a constant supply of air to  
6 the reactor vessel at 80 mL min<sup>-1</sup>. Dissolved oxygen levels were monitored by a polarographic  
7 probe calibrated with respect to an air-saturated medium. Cultures were agitated to ensure  
8 fast mixing as well as aerobic conditions such that the DO level always remained above 60 %.  
9 A silicone based anti-foam agent was added to the reactor vessel as and when required to  
10 prevent foam formation and wall growth. For chemostat mode operation, the dilution rate  
11 was set by fixing the input feed flow rate while a constant volume was maintained inside the  
12 reactor vessel by controlling the output feed flow rate via proportional control based on the  
13 on-line monitoring of the change in weight of the reactor vessel. The O<sub>2</sub> and CO<sub>2</sub> levels in the  
14 off-gas were measured using a Tandem gas analyser (Magellan Biotech, UK). After inoculation,  
15 cells were grown in batch phase for some time to allow exhaustion of the initial carbon source  
16 (indicated by a rise in DO level), followed by initiating the input and output feed supplies. At  
17 any particular dilution rate, steady-state samples were withdrawn after 5-6 liquid residence  
18 times. In general, three samples were collected for each dilution rate, separated by an interval  
19 of one liquid residence time.

## 20 Sample collection and processing

21 For determination of residual substrate concentration inside the reactor, samples were  
22 withdrawn directly from the vessel. To achieve rapid biomass separation, culture samples  
23 were withdrawn using vacuum through a sampling tube attached to a 0.2-micron syringe filter  
24 and stored at -20 °C until analysis. Samples for determination of biomass and enzyme  
25 activities were collected in a sampling bottle kept on ice. Biomass samples were processed  
26 immediately, while samples for measuring enzyme activities were pelleted, washed and  
27 stored at -20 °C until processing.

## 28 Substrate analysis

29 Glycerol and sorbitol concentrations were estimated by high-performance liquid  
30 chromatography (HPLC) analysis (1100 series, Agilent Technologies, Palo Alto, USA) with  
31 detection limits of ~1 mg/l and ~30 mg/l. An ion-exclusion chromatography column from

1 Phenomenex, California, USA (ROA-Organic acid H<sup>+</sup> column, 300 x 7.8 mm, 8 μm particle size,  
2 8% cross linkage) with a guard column (Carbo-H cartridges) was used with 5 mM H<sub>2</sub>SO<sub>4</sub> in  
3 ultrapure water as mobile phase supplied at a constant flow rate of 0.5 mL min<sup>-1</sup>. The column  
4 chamber was maintained at 60 °C and a refractive index detector was used for substrate  
5 measurement. Methanol concentrations were determined with a gas chromatograph  
6 equipped with a flame ionisation detector (GC-FID) (7890A, Agilent Technologies, Palo Alto,  
7 USA) using a HP-PLOT/Q column (30 m x 0.32 mm, 20 μm) from Agilent Technologies and  
8 nitrogen as the carrier gas. The detection limit for methanol was ~5 mg/l.

### 9 Dry cell weight measurement

10 A known volume of the fermentation broth was collected and pelleted in a pre-weighed  
11 centrifuge tube. Pellets were washed twice with distilled water and then dried at 80 °C to  
12 constant weight.

### 13 Cell-free extract preparation

14 Culture samples were collected on ice and immediately centrifuged at 4 °C to collect cells. The  
15 cell pellets were washed twice with phosphate buffer (100 mM, pH 7.4) and stored at -20 °C  
16 until analysis. For cell lysis, pellets were resuspended in 100 μl of chilled breaking buffer  
17 (Jungo *et al.*, 2006). Acid-washed glass beads (0.40–0.45 mm diameter) were added to the  
18 resulting slurry followed by alternate vortexing (1 min) and resting (on ice for 1 min) steps.  
19 This cycle was repeated 4-5 times, after which the cell debris was removed by centrifugation.  
20 Cell-free extracts (supernatant) were collected in fresh tubes kept on ice and immediately  
21 used for the estimation of enzyme activities. The Bradford assay was used for the estimation  
22 of the total protein content of the cell-free extracts for which bovine serum albumin served  
23 as standard (Bradford 1976).

### 24 β-galactosidase assay

25 β-galactosidase assays were performed according to the method described by Miller (1972)  
26 with modifications. Briefly, cell-free extracts were appropriately diluted and mixed with Z-  
27 buffer containing β-mercaptoethanol (Miller 1972) and incubated at 30 °C in a water-bath for  
28 15-20 minutes. The reaction was started by adding ONPG and stopped by adding Na<sub>2</sub>CO<sub>3</sub>  
29 when sufficient colour had developed. The specific β-galactosidase activity was calculated  
30 with the formula

$$1000 \times \frac{\text{OD}_{420}/\text{Reaction time (min)}}{\text{Protein concentration in extract (mg/mL)} \times \text{Sample volume (mL)}}$$

and expressed in units  $\text{mgp}^{-1}$  where  $\text{mgp}$  denotes mg of total protein.

### Alcohol oxidase assay

Appropriate dilutions of the cell-free extracts were used to measure alcohol oxidase activities based on the method adapted from Jungo et al (2006). A fresh 2x stock of the assay reaction mixture containing 0.8 mM 4-aminoantipyrine, 50 mM phenolsulfonic acid, freshly prepared 4 U/mL horseradish peroxidase in potassium phosphate buffer (200 mM, pH 7.4) was prepared before setting up the assays. 100  $\mu\text{L}$  of the diluted cell-free extracts were mixed with 25  $\mu\text{L}$  methanol and incubated at 30  $^{\circ}\text{C}$  for 10 minutes. After this, 100  $\mu\text{L}$  of the 2x reaction mixture stock was added to the mix at time  $t = 0$  to start the reaction and the increase in absorbance at 500 nm was monitored every 30 seconds for 10 minutes using a microplate reader (SpectraMax M2e, Molecular Devices Corporation, CA, USA). The specific alcohol oxidase activity was calculated with the formula

$$100,000 \times \frac{\text{OD}_{500}/\text{Reaction time (s)}}{\text{Protein concentration in extract (mg/mL)} \times \text{Sample volume (mL)}}$$

and reported in units  $\text{mgp}^{-1}$ .

### Calculating substrate consumption and protein expression rates from the data

We are concerned with experiments in which a chemostat is fed with the primary carbon source  $S_1$  (methanol) and a secondary carbon source  $S_2$  which may be repressing (glycerol) or non-repressing (sorbitol). The primary carbon source  $S_1$  induces the synthesis of the enzyme  $E_1$  which represents LacZ or AOX since the latter is expressed almost entirely from an *AOX1* promoter. We are interested in measuring the steady state concentrations of biomass  $X$ , primary carbon source  $S_1$ , and secondary carbon source  $S_2$  as well as the specific activity of enzyme  $E_1$ . These quantities are denoted  $x$ ,  $s_1$ ,  $s_2$ , and  $e_1$ , respectively, and satisfy the mass balances:

$$0 = \frac{dx}{dt} = -Dx + \mu x, \quad (1)$$

$$0 = \frac{ds_1}{dt} = D(s_{f,1} - s_1) - r_{s,1}x, \quad (2)$$



$$0 = \frac{ds_2}{dt} = D(s_{f,2} - s_2) - r_{s,2}x, \quad (3)$$

$$0 = \frac{de_1}{dt} = r_{e,1} - \mu e_1, \quad (4)$$

1 where  $s_{f,1}$ ,  $s_{f,2}$  denote the respective feed concentrations of  $S_1$ ,  $S_2$ ; and  $\mu$ ,  $r_{s,1}$ ,  $r_{s,2}$ ,  $r_{e,1}$   
2 denote the respective specific rates of growth, consumption of substrate, and expression of  
3 a stable intracellular protein (Pfeffer *et al.*, 2011; Singh and Narang, 2020). It follows from Eqs.  
4 (1)–(4) that

$$5 \quad r_{s,i} = \frac{D(s_{f,i} - s_i)}{x}, i = 1,2, \quad (5)$$

$$6 \quad r_{e,1} = D e_1. \quad (6)$$

7 These equations were used to calculate  $r_{s,1}$ ,  $r_{s,2}$ , and  $r_{e,1}$  from the measured values of the  
8 operating conditions  $D$ ,  $s_{f,i}$  and the steady state concentrations  $s_i$ ,  $x$ , and  $e_1$ .

## 9 Results

### 10 Substrate consumption and $P_{AOX1}$ expression in the presence of glycerol and sorbitol

11 Our goal is to study the kinetics of substrate consumption and  $P_{AOX1}$  expression during mixed-  
12 substrate growth on methanol + glycerol and methanol + sorbitol; however, we also  
13 characterized the substrate consumption kinetics during single-substrate growth on glycerol  
14 and sorbitol. In batch (shake-flask) cultures grown on glycerol and sorbitol, the biomass yields  
15 were quite similar ( $\sim 0.6$  gdw  $g^{-1}$ ), but the maximum specific growth rates  $\mu_m$  were  
16 dramatically different (Table 1). Due to the exceptionally small  $\mu_m$  of  $0.03$   $h^{-1}$  on sorbitol, we  
17 could not perform chemostat experiments with pure sorbitol, but we did perform such  
18 experiments with glycerol. We found that the biomass and residual glycerol concentrations  
19 followed the pattern characteristic of single-substrate growth in continuous cultures (Fig. 1a).  
20 The specific glycerol consumption rate, calculated from these data using Eq. (5), increased  
21 linearly with  $D$  with a significant positive  $y$ -intercept (Fig. 1b). Fitting these data to Pirt's  
22 model (Pirt, 1965) gave a true biomass yield of  $0.67$  gdw  $g^{-1}$ , and specific maintenance rate of  
23  $0.07$  g gdw $^{-1}$   $h^{-1}$ . The specific LacZ and AOX activities which were positively correlated in  
24 general, decreased with  $D$  (Fig. 1c). The specific LacZ and AOX expression rates, calculated

1 from the data in Fig. 1c using Eq. (6), did not exceed  $\sim 1000$  and  $\sim 300$  units  $\text{mgp}^{-1} \text{h}^{-1}$ ,  
2 respectively (Fig. 1d).

### 3 Substrate consumption and $P_{AOX1}$ expression in the presence of mixtures

4 When the Mut<sup>+</sup> strain is grown in batch cultures of methanol + glycerol and methanol +  
5 sorbitol, there is diauxic growth, but methanol is the *unpreferred* substrate during growth on  
6 methanol + glycerol, and the *preferred* substrate during growth on methanol + sorbitol  
7 (Ramón *et al.*, 2007). Such mixtures, which display diauxic growth in batch cultures, exhibit a  
8 characteristic substrate concentration profile in continuous cultures (Egli *et al.*, 1986; Noel  
9 and Narang, 2009) (Supplementary Fig. S1a). In the *dual-limited* regime, which extends up to  
10 dilution rates approximately equal to the  $\mu_m$  for the unpreferred substrate, both substrates  
11 limit growth because their residual concentrations  $s_i$  are on the order of their saturation  
12 constants  $K_{S,i}$  ( $s_i \sim K_{S,i}$ ), and therefore, both substrates are completely consumed ( $s_i \ll s_{f,i}$ ).  
13 Beyond the dual-limited regime, only the preferred substrate limits growth because the  
14 residual concentration of the unpreferred substrate is well above its saturation constant. At  
15 the intermediate  $D$  corresponding to the *transition* regime, the preferred substrate is still  
16 consumed completely, but the unpreferred substrate is only partially consumed. Beyond the  
17 transition regime, the unpreferred substrate is not consumed at all.

18 When methanol + glycerol and methanol + sorbitol were fed to a continuous culture, the  
19 variation of the substrate concentrations with  $D$  was consistent with the characteristic  
20 pattern described above. In the dual-limited regime, both substrates were completely  
21 consumed — up to  $D = 0.08 \text{ h}^{-1} \approx 0.11 \text{ h}^{-1} = \mu_m|_{\text{methanol}}$  (Singh and Narang, 2020) in Fig.  
22 2a and  $D = 0.03 \text{ h}^{-1} = \mu_m|_{\text{sorbitol}}$   $\text{h}^{-1}$  in Fig. 3a. In the transition regime, the unpreferred  
23 substrate was partially consumed up to dilution rates well above its  $\mu_m$  — up to  $D = 0.2 \approx$   
24  $2 \times \mu_m|_{\text{methanol}} \text{ h}^{-1}$  in Fig. 2a, and up to  $D = 0.08 \approx 3 \times \mu_m|_{\text{sorbitol}} \text{ h}^{-1}$  in Fig. 3a.

25 During single-substrate growth, the specific substrate consumption rate usually increases  
26 linearly with  $D$  up to washout (Pirt, 1965), but during mixed-substrate growth, the specific  
27 substrate consumption rates increase linearly with  $D$  only in the dual-limited regime (Egli *et*  
28 *al.*, 1986; Noel and Narang, 2009) (Supplementary Fig. S1b). The dashed lines in Figs. 2b and  
29 3b show that during growth on methanol + glycerol and methanol + sorbitol, the specific  
30 methanol consumption rate is indeed proportional to  $D$  up to  $D = 0.08 \text{ h}^{-1}$  and  $D =$

1 0.03 h<sup>-1</sup>, respectively. Beyond the respective dual-limited regimes, the specific methanol  
2 consumption rates change non-linearly (Supplementary Fig. S1b). In the case of methanol +  
3 glycerol, the specific methanol consumption rate decreases nonlinearly beyond  $D = 0.08$  h<sup>-1</sup>  
4 due to repression of methanol consumption by glycerol (Fig. 2b); in the case of methanol +  
5 sorbitol, the specific methanol consumption rate increases non-linearly beyond  $D = 0.03$  h<sup>-1</sup>  
6 due to the enhanced methanol consumption that occurs to compensate for repression of  
7 sorbitol consumption by methanol (Fig. 3b). Now, by a judicious choice of the feed  
8 concentrations calculated from Egli's model for dual-limited growth (Egli et al., 1993), we  
9 ensured that when growth on both the mixtures is dual-limited ( $D \leq 0.03$  h<sup>-1</sup>), the specific  
10 methanol consumption rates of the two mixtures are not only proportional to  $D$ , but also  
11 equal in magnitude. The specific methanol consumption rates of the two mixtures start  
12 diverging beyond  $D = 0.03$  h<sup>-1</sup>, but they remain approximately equal up to  $D = 0.05$  h<sup>-1</sup>.

13 Although it is widely accepted that glycerol is repressing and sorbitol is non-repressing in  
14 batch cultures, we found remarkably similar specific LacZ and AOX activities and expression  
15 rates in continuous cultures fed with methanol + glycerol and methanol + sorbitol. At low  
16 dilution rates ( $D \leq 0.05$  h<sup>-1</sup>), when both mixtures support equal specific methanol  
17 consumption rates, the specific LacZ and AOX activities on both mixtures are also equal (Figs.  
18 2c and 3c), and hence, their specific LacZ and AOX expression rates are also the same (Figs.  
19 2d and 3d). At high dilution rates ( $D \geq 0.05$  h<sup>-1</sup>), the specific methanol consumption rates of  
20 both mixtures change substantially, but the specific LacZ and AOX expression rates are  
21 relatively insensitive to this change. Indeed, in the case of methanol + glycerol, the specific  
22 methanol consumption rate doubles when  $D$  increases from 0.05 h<sup>-1</sup> to 0.12 h<sup>-1</sup>, and  
23 decreases 40 % when  $D$  increases from 0.12 h<sup>-1</sup> to 0.20 h<sup>-1</sup>. But the specific LacZ and AOX  
24 activities decrease inversely with  $D$  (Fig. 2c), and hence, the specific LacZ and AOX expression  
25 rates are constant (Figs. 2c and 2d). In the case of methanol + sorbitol, the specific methanol  
26 consumption rate doubles when  $D$  increases from 0.05 h<sup>-1</sup> to 0.08 h<sup>-1</sup>, but the specific LacZ  
27 and AOX expression rates increase only 25 % (Fig. 3d). Furthermore, the constant maximum  
28 specific LacZ and AOX expression rates of 4000–6000 units mgp<sup>-1</sup> h<sup>-1</sup> and 1200–2000 units  
29 mgp<sup>-1</sup> h<sup>-1</sup>, respectively, are close to the corresponding maximum values observed during  
30 growth on methanol + glycerol. Taken together, these data suggest that the specific  $P_{AOX1}$

1 expression rate is a function (i.e., completely determined by) the specific methanol  
2 consumption rate.

3 The specific  $P_{AOX1}$  expression rate is a function of the specific methanol consumption rate  
4 To test this hypothesis, we plotted the specific LacZ and AOX expression rates  $r_{e,1}$  at various  
5  $D$  in Figs. 2d–3d against the corresponding specific methanol consumption rate  $r_{s,1}$  in Figs.  
6 2b–3b. This yielded the graph in Fig. 4 which shows that at every specific methanol  
7 consumption rate, both mixed-substrate cultures have approximately the same specific  $P_{AOX1}$   
8 expression rate. The specific  $P_{AOX1}$  expression rate is therefore completely determined by the  
9 specific methanol consumption rate regardless of the type (repressing or non-repressing) of  
10 the secondary carbon source. More precisely, the specific  $P_{AOX1}$  expression rate,  $r_{e,1}$  is  
11 proportional to the specific methanol consumption rate,  $r_{s,1}$  up to the threshold value  $\sim 0.15$   
12  $\text{g gdw}^{-1} \text{h}^{-1}$  and remains approximately constant thereafter at the maximum value of  $\sim 5$  units  
13  $\text{gdw}^{-1} \text{h}^{-1}$ . Hence, the specific  $P_{AOX1}$  expression rates of the mixtures can be approximated by  
14 the piecewise linear function

$$15 \quad r_{e,1} = \begin{cases} V_{e,1} \left( \frac{r_{s,1}}{r_{s,1}^*} \right), & r_{s,1} \leq r_{s,1}^* \\ V_{e,1}, & r_{s,1} > r_{s,1}^* \end{cases}, \quad (7)$$

16 where  $V_{e,1}$  denotes the maximum specific  $P_{AOX1}$  expression rate, and  $r_{s,1}^*$  denotes the  
17 threshold specific methanol consumption rate beyond which the specific  $P_{AOX1}$  expression  
18 rate has its maximum value  $V_{e,1}$ .

## 19 Discussion

20 Our main conclusion is that over the range of dilution rates considered in our work (0.02–0.2  
21  $\text{h}^{-1}$ ), the  $P_{AOX1}$  expression rate is completely determined by the methanol consumption rate  
22 regardless of the type of the secondary carbon source. This conclusion may appear to subvert  
23 the prevailing consensus according to which the expression rate of a promoter is strongly  
24 inhibited in the presence of repressing secondary carbon sources. However, this conclusion  
25 is based on studies with *batch* cultures. We show below that our conclusion is consistent with  
26 the *continuous* culture studies reporting the expression of not only the  $AOX1$  promoter of *K.*  
27 *phaffii* but also the exemplary *lac* promoter of *E. coli*.

## 1 Comparison with chemostat studies of $P_{AOX1}$ expression by *K. phaffii*

2 Jungo *et al* performed their mixed-substrate studies by fixing  $D$ ,  $s_{f,1} + s_{f,2}$  and increasing the  
3 fraction of methanol in the feed  $\sigma_1 = s_{f,1}/(s_{f,1} + s_{f,2})$  at a slow linear rate aimed at  
4 maintaining quasi-steady state. They found that as  $\sigma_1$  increased:

5 a) The residual methanol remained negligibly small, and the biomass concentration  
6 decreased linearly.

7 b) The specific biotin expression rate increased hyperbolically until it reached a  
8 maximum, which was essentially the same for both mixtures.

9 It follows from a) that the specific methanol consumption rate, which is approximately equal  
10 to  $D(s_{f,1} + s_{f,2})\sigma_1/x$ , increased throughout their experiment. But then b) implies that as the  
11 specific methanol consumption rate increased, the specific biotin expression rate of all three  
12 cultures reached essentially the *same* maximum (cf. Fig. 5).

13 Berrios and co-workers compared the methanol consumption and ROL production rates of  
14 the Mut<sup>+</sup> strain at two different temperatures (22 and 30 °C) during growth on methanol,  
15 methanol + glycerol, and methanol + sorbitol (Berrios *et al.*, 2017). These experiments were  
16 done in chemostats operated at  $D = 0.03 \text{ h}^{-1}$ , and in the case of mixed-substrate  
17 experiments, fed with two feed compositions (40 and 70 C-mole % methanol). They found  
18 that, "Sorbitol-based cultures led to a higher  $q_p$  than both glycerol-based and control cultures  
19 at most studied conditions." But, closer inspection shows that that in all their experiments,  
20 the specific expression rates were 0.8–0.9 units  $\text{gdw}^{-1} \text{ h}^{-1}$ , which is close to the maximum  
21 specific expression rate of 1 unit  $\text{gdw}^{-1} \text{ h}^{-1}$ . It is therefore conceivable that the higher  
22 productivities observed with sorbitol-based cultures are not statistically significant.

## 23 Comparison with chemostat studies of expression by *lac* promoter of *E. coli*

24 Analogous results have also been obtained in studies of *lac* expression in *E. coli*. Indeed, batch  
25 experiments with mixtures of lactose + glycerol, lactose + glucose, and lactose + glucose-6-  
26 phosphate show that glycerol is non-repressing, whereas glucose and glucose-6-phosphate are  
27 repressing (Magasanik, 1970). However, when chemostat experiments were performed with  
28 these three mixtures (Smith and Atkinson, 1980), they yielded the *same* steady state specific  
29  $\beta$ -galactosidase (LacZ) activity at all  $D \lesssim 0.5 \text{ h}^{-1}$  (Supplementary Fig. S2). Furthermore, when

1 the steady state specific LacZ activities at various  $D$  were plotted against the corresponding  
2 specific lactose consumption rates at the same  $D$ , the data for all three mixtures collapsed  
3 into a single line (Supplementary Fig. S3). This led the authors to conclude that the steady  
4 state specific LacZ activity was “an apparently linear function of the rate of lactose utilization  
5 independent of the rate of metabolism of substrates other than lactose which are being  
6 concurrently utilized.” But then it follows from Eq. (6) that the steady state specific LacZ  
7 expression rate is also completely determined by the specific lactose consumption rate  
8 regardless of the type (repressing or non-repressing) of the secondary carbon source  
9 (Supplementary Fig. S4).

10 In conclusion, the specific  $P_{AOX1}$  expression rate of *K. phaffii* appears to be completely  
11 determined by the specific methanol consumption rate regardless of the type (repressing or  
12 non-repressing) of the secondary carbon source. Analysis of the literature shows that the  
13 specific expression rate of the *lac* operon of *E. coli* is also completely determined by the  
14 specific lactose consumption rate regardless of the type of secondary carbon source. It would  
15 be interesting to explore if similar results are obtained in other microorganisms and substrate  
16 mixtures.

## 17 **Declarations**

## 18 **Funding Information**

19 The authors would like to thank Department of Biotechnology (Government of India) for  
20 funding this project (grant BT/PR13831/BBE/117/68/2015).

## 21 **Conflict of Interest**

22 The authors declare that they have no conflict of interest.

## 23 **Availability of data and material**

24 Raw data is available upon request.

## 25 **Code availability**

26 Not applicable

## 1 Author's contribution

2 AS and AN conceived and designed the research. AS conducted the experiments. AS and AN  
3 analysed the data and wrote the manuscript. All authors read and approved the manuscript.

## 4 Compliance with ethical standards

5 The authors declare that no human participants or animals were used for the purpose of this  
6 study.

## 7 Consent to participate

8 Not applicable

9

## 1   References

- 2   Ahmad M, Hirz M, Pichler H, Schwab H (2014) Protein expression in *Pichia pastoris*: recent  
3   achievements and perspectives for heterologous protein production. *Appl Microbiol Biot*  
4   98(12):5301-5317.
- 5   Arnau C, Casas C, Valero F (2011) The effect of glycerol mixed substrate on the heterologous  
6   production of a *Rhizopus oryzae* lipase in *Pichia pastoris* system. *Biochem Eng J* 57:30-37.
- 7   Azadi S, Mahboubi A, Naghdi N, Solaimanian R, Mortazavi SA (2017) Evaluation of sorbitol-  
8   methanol co-feeding strategy on production of recombinant human growth hormone in  
9   *Pichia pastoris*. *Iran J Pharm Sci* 16(4):1555-1564.
- 10   Berrios J, Flores MO, Díaz-Barrera A, Altamirano C, Martínez I, Cabrera Z (2017) A comparative  
11   study of glycerol and sorbitol as co-substrates in methanol-induced cultures of *Pichia pastoris*:  
12   temperature effect and scale-up simulation. *J Ind Microbiol* 44(3):407-411.
- 13   Bradford MM (1976) A rapid and sensitive method for the quantitation of microgram  
14   quantities of protein utilizing the principle of protein-dye binding. *Anal Biochem* 72(1-2):248-  
15   254.
- 16   Brierley RA, Bussineau C, Kosson R, Melton A, Siegel RS (1990) Fermentation development of  
17   recombinant *Pichia pastoris* expressing the heterologous gene: bovine lysozyme. *Ann N Y*  
18   *Acad Sci* 589(1):350-362.
- 19   Canales C, Altamirano C, Berrios J (2015) Effect of dilution rate and methanol-glycerol mixed  
20   feeding on heterologous *Rhizopus oryzae* lipase production with *Pichia pastoris* Mut<sup>+</sup>  
21   phenotype in continuous culture. *Biotechnol Prog* 31(3):707-714.
- 22   Carly F, Niu H, Delvigne F, Fickers P (2016) Influence of methanol/sorbitol co-feeding rate on  
23   pAOX1 induction in a *Pichia pastoris* Mut<sup>+</sup> strain in bioreactor with limited oxygen transfer  
24   rate. *J Ind Microbiol Biotechnol* 43(4):517-523.
- 25   Çelik E, Çalık P, Oliver SG (2009) Fed-batch methanol feeding strategy for recombinant protein  
26   production by *Pichia pastoris* in the presence of co-substrate sorbitol. *Yeast* 26(9):473-484.



- 1 Chen L, Mohsin A, Chu J, Zhuang Y, Liu Y, Guo M (2017) Enhanced protein production by  
2 sorbitol co-feeding with methanol in recombinant *Pichia pastoris* strains. *Biotechnol*  
3 *Bioprocess Eng* 22(6):767-773.
- 4 Chiruvolu V, Cregg JM, Meagher MM (1997) Recombinant protein production in an alcohol  
5 oxidase-defective strain of *Pichia pastoris* in fed-batch fermentations. *Enzyme Microb*  
6 *Technol* 21(4):277-283.
- 7 Cos O, Ramón R, Montesinos JL, Valero F (2006) Operational strategies, monitoring and  
8 control of heterologous protein production in the methylotrophic yeast *Pichia pastoris* under  
9 different promoters: a review. *Microb Cell Factories* 5(1):1-20.
- 10 Cregg JM, Barringer KJ, Hessler AY, Madden KR (1985) *Pichia pastoris* as a host system for  
11 transformations. *Mol Cell Biol* 5(12):3376-3385.
- 12 Cregg JM, Madden KR, Barringer KJ, Thill GP, Stillman CA (1989) Functional characterization  
13 of the two alcohol oxidase genes from the yeast *Pichia pastoris*. *Mol Cell Biol* 9(3):1316-1323.
- 14 Egli T, Bosshard C and Hamer G (1986) Simultaneous utilization of methanol–glucose mixtures  
15 by *Hansenula polymorpha* in chemostat: Influence of dilution rate and mixture composition  
16 on utilization pattern. *Biotechnol and bioeng* 28(11):1735-1741.
- 17 Egli T, Fiechter A (1981) Theoretical analysis of media used in the growth of yeasts on  
18 methanol. *Microbiol* 123(2):365-369.
- 19 Egli T, Lendenmann U and Snozzi M (1993) Kinetics of microbial growth with mixtures of  
20 carbon sources. *Antonie van Leeuwenhoek* 63(3):289-298.
- 21 Egli T, Mason CA (1991) Mixed substrates and mixed cultures. *Biotechnol* 18:173-201.
- 22 Gao MJ, Li Z, Yu RS, Wu JR, Zheng ZY, Shi ZP, Zhan XB and Lin CC (2012) Methanol/sorbitol co-  
23 feeding induction enhanced porcine interferon- $\alpha$  production by *P. pastoris* associated with  
24 energy metabolism shift. *Bioprocess Biosyst Eng* 35(7):1125-1136.
- 25 García-Ortega X, Cámara E, Ferrer P, Albiol J, Montesinos-Seguí JL, Valero F (2019) Rational  
26 development of bioprocess engineering strategies for recombinant protein production in  
27 *Pichia pastoris* (*Komagataella phaffii*) using the methanol-free GAP promoter. Where do we  
28 stand?. *N Biotechnol* 53:24-34.

- 1 Gasser B, Mattanovich D (2018) A yeast for all seasons—Is *Pichia pastoris* a suitable chassis  
2 organism for future bioproduction?. FEMS Microbiol Lett 365(17):fny181.
- 3 Higgins DR, Cregg JM (1998) Introduction to *Pichia pastoris*. In: *Pichia protocols*. Humana  
4 Press, pp 1-15
- 5 Inan M, Meagher MM (2001) Non-repressing carbon sources for alcohol oxidase (AOX1)  
6 promoter of *Pichia pastoris*. J Biosci Bioeng 92(6):585-589.
- 7 Jahic M, Veide A, Charoenrat T, Teeri T, Enfors SO (2006) Process technology for production  
8 and recovery of heterologous proteins with *Pichia pastoris*. Biotechnol Prog 22(6):1465-1473.
- 9 Jungo C, Marison I, von Stockar U (2007a) Mixed feeds of glycerol and methanol can improve  
10 the performance of *Pichia pastoris* cultures: A quantitative study based on concentration  
11 gradients in transient continuous cultures. J Biotechnol 128(4):824-837.
- 12 Jungo C, Rérat C, Marison IW, von Stockar U (2006) Quantitative characterization of the  
13 regulation of the synthesis of alcohol oxidase and of the expression of recombinant avidin in  
14 a *Pichia pastoris* Mut<sup>+</sup> strain. Enzyme Microb Technol 39(4), pp.936-944.
- 15 Jungo C, Schenk J, Pasquier M, Marison IW, von Stockar U (2007b) A quantitative analysis of  
16 the benefits of mixed feeds of sorbitol and methanol for the production of recombinant avidin  
17 with *Pichia pastoris*. J Biotechnol 131(1):57-66.
- 18 Juturu V, Wu JC (2018) Heterologous protein expression in *Pichia pastoris*: latest research  
19 progress and applications. ChemBioChem 19(1):7-21.
- 20 Kurtzman CP (2005) Description of *Komagataella phaffii* sp. nov. and the transfer of *Pichia*  
21 *pseudopastoris* to the methylotrophic yeast genus *Komagataella*. Int J Syst Evol Microbiol  
22 55(2):973-976.
- 23 Kurtzman CP (2009) Biotechnological strains of *Komagataella (Pichia) pastoris* are  
24 *Komagataella phaffii* as determined from multigene sequence analysis. J Ind Microbiol  
25 Biotechnol 36(11):1435.
- 26 Liu WC, Inwood S, Gong T, Sharma A, Yu LY, Zhu P (2019) Fed-batch high-cell-density  
27 fermentation strategies for *Pichia pastoris* growth and production. Crit Rev Biotechnol  
28 39(2):258-271.

- 1 Luedeking R, Piret EL (1959) A Kinetic Study of the Lactic Acid Fermentation. Batch Process at  
2 Controlled pH. J Biochem Microbiol Technol Eng 1:393-412.
- 3 Macauley-Patrick S, Fazenda ML, McNeil B, Harvey, LM (2005) Heterologous protein  
4 production using the *Pichia pastoris* expression system. Yeast 22(4):249-270.
- 5 Magasanik B (1970) Glucose effects: inducer exclusion and repression. In: The Lactose Operon  
6 (eds J. Beckwith & D. Zipser), Cold Spring Harbor Press, New York, pp. 189–220.
- 7 Miller JH (1972) Experiments in molecular genetics. Cold Spring Harbor, Cold Spring Harbor,  
8 NY.
- 9 Nieto-Taype MA, Garcia-Ortega X, Albiol J, Montesinos-Seguí JL, Valero F (2020) Continuous  
10 cultivation as a tool toward the rational bioprocess development with *Pichia Pastoris* cell  
11 factory. Front Bioeng Biotechnol 8:632.
- 12 Niu H, Jost L, Pirlot N, Sassi H, Daukandt M, Rodriguez C, Fickers P (2013) A quantitative study  
13 of methanol/sorbitol co-feeding process of a *Pichia pastoris* Mut<sup>+</sup>/pAOX1-lacZ strain. Microb  
14 cell factories 12(1):1-8.
- 15 Noel JT, Narang A (2009) Gene regulation in continuous cultures: A unified theory for bacteria  
16 and yeasts. B math biol 71(2):453-514.
- 17 Paulová L, Hyka P, Branská B, Melzoch K, Kovar K (2012) Use of a mixture of glucose and  
18 methanol as substrates for the production of recombinant trypsinogen in continuous cultures  
19 with *Pichia pastoris* Mut<sup>+</sup>. J Biotechnol 157(1):180-188.
- 20 Pirt SJ (1965) The maintenance energy of bacteria in growing cultures. Proc Royal Soc B  
21 163(991):224-231.
- 22 Potvin G, Ahmad A, Zhang Z (2012) Bioprocess engineering aspects of heterologous protein  
23 production in *Pichia pastoris*: a review. Biochem Eng J 64:91-105.
- 24 Ramón R, Ferrer P, Valero F (2007) Sorbitol co-feeding reduces metabolic burden caused by  
25 the overexpression of a *Rhizopus oryzae* lipase in *Pichia pastoris*. J Biotechnol 130(1):39-46.
- 26 Schenk J, Balazs K, Jungo C, Urfer J, Wegmann C, Zocchi A, Marison IW, von Stockar U (2008)  
27 Influence of specific growth rate on specific productivity and glycosylation of a recombinant  
28 avidin produced by a *Pichia pastoris* Mut<sup>+</sup> strain. Biotechnol Bioeng 99(2):368-377.

- 1 Schwarzahans JP, Wibberg D, Winkler A, Luttermann T, Kalinowski J, Friehs K (2016) Non-  
2 canonical integration events in *Pichia pastoris* encountered during standard transformation  
3 analysed with genome sequencing. *Sci Rep* 6:38952.
- 4 Singh A, Narang A (2020) The Mut<sup>+</sup> strain of *Komagataella phaffii* (*Pichia pastoris*) expresses  
5 P<sub>AOX1</sub> 5- and 10-times faster than Mut<sup>s</sup> and Mut<sup>-</sup> strains: evidence that formaldehyde or/and  
6 formate are true inducers of P<sub>AOX1</sub>. *Appl Microbiol Biotechnol* 104(18):7801-7814.
- 7 Smith SS, Atkinson DE (1980) The expression of  $\beta$ -galactosidase by *Escherichia coli* during  
8 continuous culture. *Arch Biochem Biophys* 202(2):573-581.
- 9 Thorpe ED, d'Anjou MC, Daugulis AJ (1999) Sorbitol as a non-repressing carbon source for fed-  
10 batch fermentation of recombinant *Pichia pastoris*. *Biotechnol Lett* 21(8):669-672.
- 11 Wang Z, Wang Y, Zhang D, Li J, Hua Z, Du G, Chen J (2010) Enhancement of cell viability and  
12 alkaline polygalacturonate lyase production by sorbitol co-feeding with methanol in *Pichia*  
13 *pastoris* fermentation. *Bioresour Technol* 101(4):1318-1323.
- 14 Xie J, Zhou Q, Du P, Gan R, Ye Q (2005) Use of different carbon sources in cultivation of  
15 recombinant *Pichia pastoris* for angiostatin production. *Enzyme Microb Technol* 36(2-3):210-  
16 216.
- 17 Yang Z, Zhang Z (2018) Engineering strategies for enhanced production of protein and bio-  
18 products in *Pichia pastoris*: a review. *Biotechnol Adv* 36(1):182-195.

19

20

21

22

23

24

25

26

1 **Table 1:** Maximum specific growth rates and biomass yields during single-substrate growth of  
2 the Mut<sup>+</sup> strain of *K. phaffii* on glycerol and sorbitol. The true biomass yield in the chemostat  
3 was determined by fitting the variation of the specific substrate consumption rate with *D* to  
4 Pirt's model.

| <b>Carbon source</b> | <b>Maximum specific growth rate (h<sup>-1</sup>)</b> | <b>Biomass yield in shake flask (gdw g<sup>-1</sup>)</b> | <b>True biomass yield in chemostat (gdw g<sup>-1</sup>)</b> |
|----------------------|------------------------------------------------------|----------------------------------------------------------|-------------------------------------------------------------|
| Glycerol             | 0.24 ± 0.01                                          | 0.61 ± 0.03                                              | 0.67                                                        |
| Sorbitol             | 0.03 ± 0.01                                          | 0.56 ± 0.01                                              | ND                                                          |

5

6

7

8

9

## 1 Figures

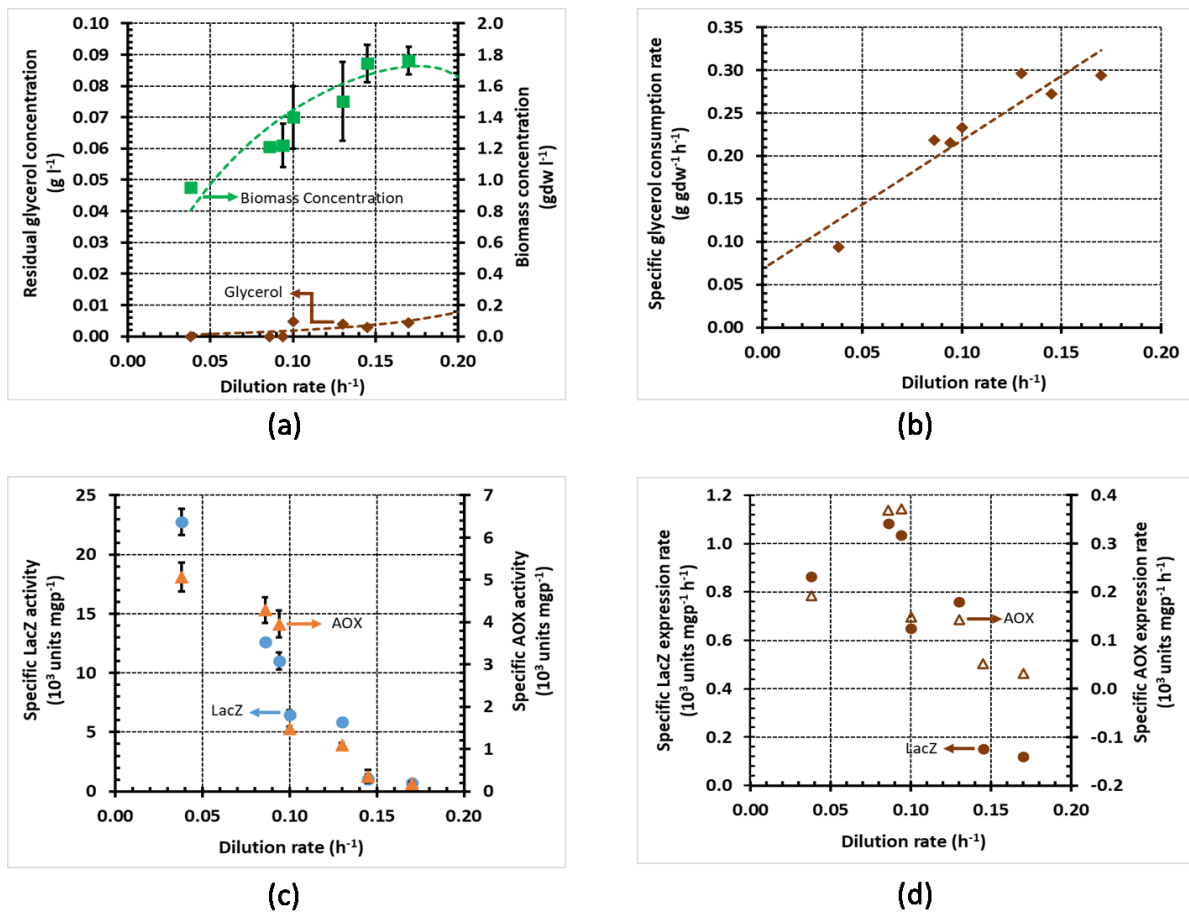

2

3 **Fig. 1:** Variation of steady state concentrations and rates with the dilution rate during growth  
 4 of *K. phaffii* strain Mut<sup>+</sup> (pSAOH5-T1) in a chemostat fed with glycerol (~3.1 g l<sup>-1</sup>). (a)  
 5 Concentrations of biomass and residual glycerol. (b) Specific glycerol consumption rates  
 6 calculated from the data in (a) using Eq. (5). (c) Specific activities of LacZ and AOX. (d) Specific  
 7 Lac Z and AOX expression rates calculated from the data in (c) using Eq. (6).

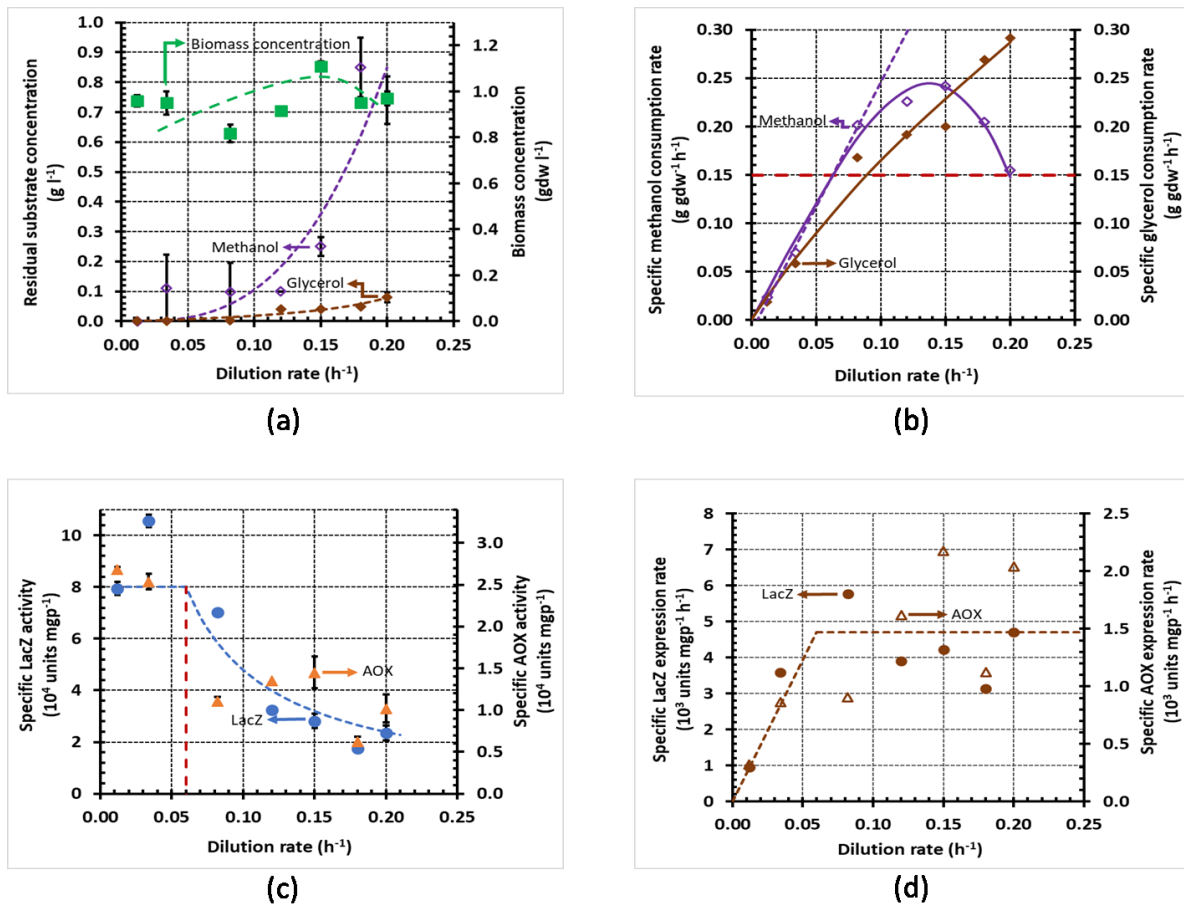

1  
2  
3  
4  
5  
6  
7  
8  
9  
10

**Fig. 2:** Variation of steady state concentrations with the dilution rate during growth of *K. phaffii* strain Mut<sup>+</sup> (pSAOH5-T1) in a chemostat fed with a mixture of glycerol (~1.5 g l<sup>-1</sup>) and methanol (~1.6 g l<sup>-1</sup>). (a) Concentrations of biomass, residual glycerol, and residual methanol (b) Specific methanol and glycerol consumption rates calculated from the data in (a) using Eq. (5). The dashed line passing through the origin shows the linear increase of the specific methanol consumption rate in the dual-limited regime. The horizontal dashed line shows the threshold specific methanol consumption rate of 0.15 g gdw<sup>-1</sup> h<sup>-1</sup>. (c) Specific activities of LacZ and AOX. (d) Specific LacZ and AOX expression rates calculated from the data in (c) using Eq. (6).

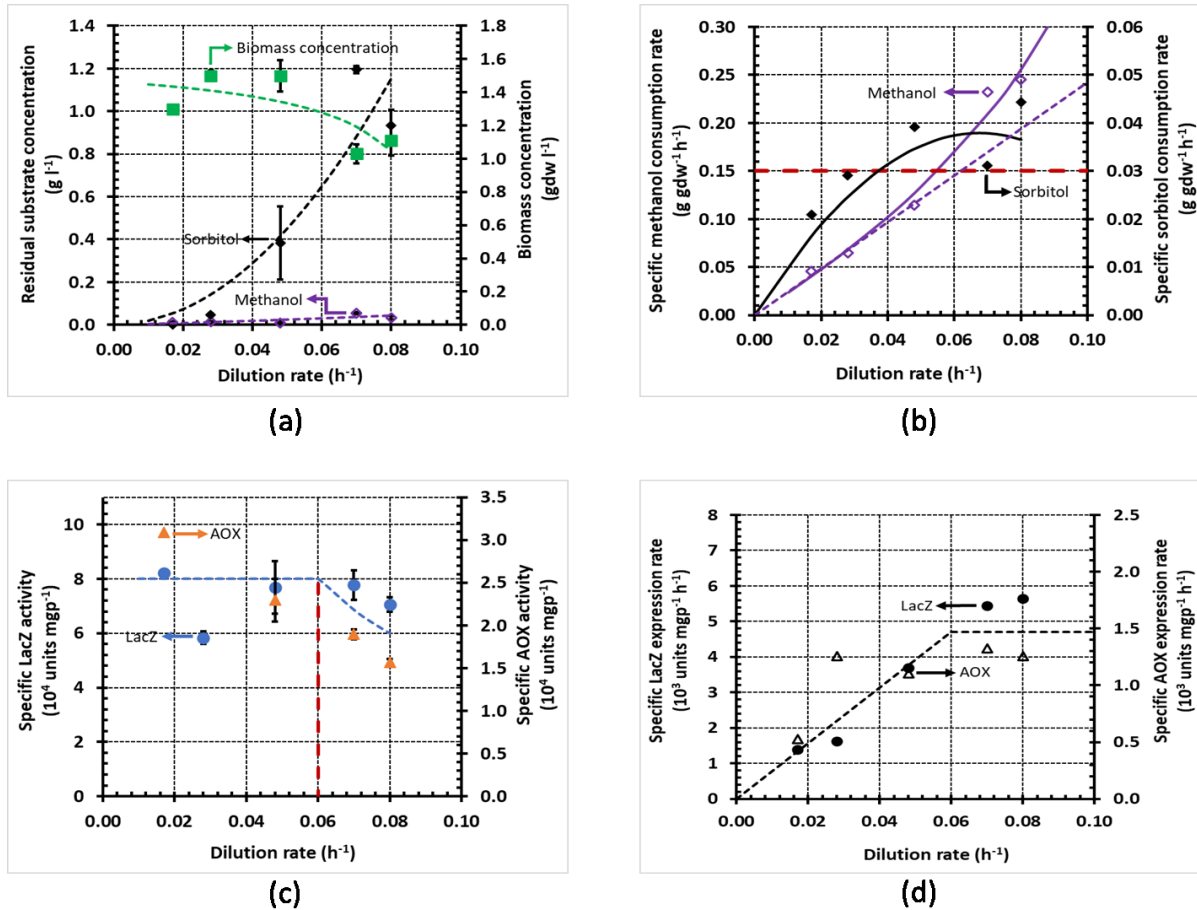

1  
2  
3  
4  
5  
6  
7  
8  
9  
10

**Fig. 3:** Variation of steady state concentrations with the dilution rate during growth of *K. phaffii* strain Mut<sup>+</sup> (pSAOH5-T1) in a chemostat fed with a mixture of sorbitol (~1.5 g l<sup>-1</sup>) and methanol (~3.2 g l<sup>-1</sup>). (a) Concentrations of biomass, residual sorbitol and residual methanol. (b) Specific methanol and glycerol consumption rates calculated from the data in (a) using Eq. (5). The dashed line passing through the origin shows the linear increase of the specific methanol consumption rate in the dual-limited regime. The horizontal dashed line shows the threshold specific methanol consumption rate of 0.15 g gdw<sup>-1</sup> h<sup>-1</sup>. (c) Specific activities of LacZ and AOX. (d) Specific LacZ and AOX expression rates calculated from the data in (c) using Eq. (6).



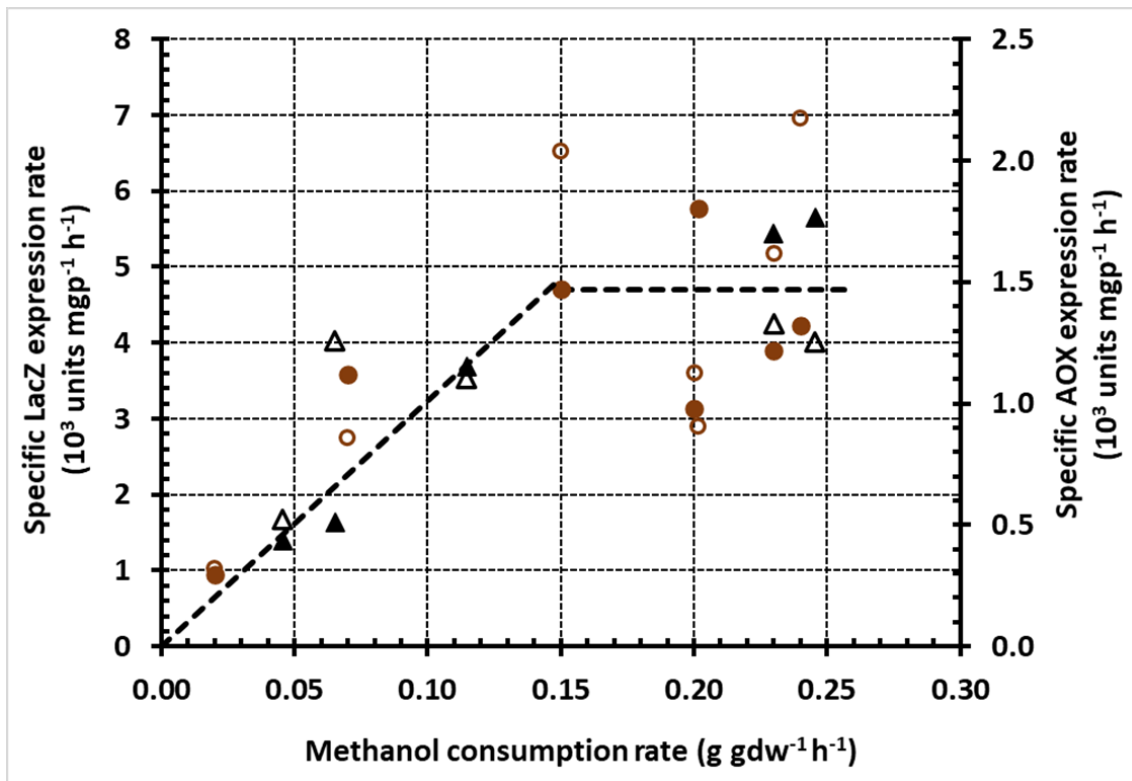

1

2 **Fig. 4:** Variation of the specific LacZ (closed symbols) and AOX (open symbols) expression rates  
3 with the specific methanol consumption rate during growth on methanol + glycerol (brown  
4 circles) and methanol + sorbitol (black triangles) The graph was obtained by plotting the  
5 specific methanol consumption rates in Figs. 2b–3b against the corresponding specific LacZ  
6 and AOX expression rates in Figs. 2d–3d.
